# Supplementary material for: Discovery and green metabolic engineering of a self-sufficient genistein pathway in Paenibacillus jilinensis
Source: Royal Society of Chemistry journal article supplement (doi:10.1039/d5gc01323b), 2025-01-01
Supplement: d5gc01323b3.xlsx [file d5gc01323b3.xlsx]

## Sheet: Comparison with DEG database
Data file S2
query_id	subject_id	pct_identity	aln_length	n_of_mismatches	gap_openings	q_start	q_end	s_start	s_end	e_value	bit_score	Notes	GrowthRateKO
YPG26_GM002447	DEG10470054	57.233	477	194	6	4	477	7	476	0	537	nicotinate and nicotinamide metabolism	0
YPG26_GM001176	DEG10650209	60.625	320	120	2	1	320	9	322	1.87e-149	422	Porphyrin metabolism	0
YPG26_GM001728	DEG10130035	45.291	223	115	4	1	222	1	217	1.22e-59	186	Riboflavin metabolism	0
YPG26_GM001174	DEG10650078	51.118	313	140	3	1	312	1	301	3.61e-105	309	Porphyrin metabolism	0
YPG26_GM003078	DEG10010092	50.929	269	124	3	1	267	1	263	1.23e-98	289	Nicotinate and nicotinamide metabolism	1.12871e-11
YPG26_GM003277	DEG10650006	56.604	212	92	0	7	218	1	212	5.37e-92	268	Purine metabolism	0
YPG26_GM002838	DEG10010210	49.223	193	91	2	3	192	5	193	2.3e-59	184	Metabolism of cofactors and vitamins	0
YPG26_GM000225	DEG10010258	73.535	529	140	0	1	529	1	529	0	843	Arginine and proline metabolism	0
YPG26_GM001595	DEG10010111	56.989	186	79	1	13	197	4	189	1.28e-75	225	Purine metabolism	0
YPG26_GM002493	DEG10470331	40.694	317	185	2	1	316	1	315	1.18e-84	257	Nicotinate and nicotinamide metabolism	0
YPG26_GM001201	DEG10400364	41.423	239	137	2	2	237	24	262	1.11e-54	179	Biosynthesis of cofactors	0
YPG26_GM003410	DEG10010219	77.02	396	89	2	4	398	3	397	0	630	Cysteine and methionine metabolism	0
YPG26_GM000688	DEG10010068	44.737	266	138	3	1	263	1	260	1.01e-69	215	Nicotinate and nicotinamide metabolism	0
YPG26_GM001465	DEG10400164	50.976	410	200	1	12	420	13	422	2.01e-145	420	Cysteine and methionine metabolism	0
YPG26_GM001837	DEG10580305	45.179	363	188	3	5	366	6	358	2.43e-100	300	Arginine and proline metabolism	0
YPG26_GM003370	DEG10400475	50.363	413	193	3	18	421	5	414	7.76e-118	349	Arginine and proline metabolism	0
YPG26_GM001589	DEG10400484	48.057	283	133	7	1	277	3	277	8.43e-82	247	Lysine biosynthesis	0
YPG26_GM002853	DEG10630234	73.77	427	103	1	5	431	4	421	0	653	Citrate cycle (TCA cycle)	0
YPG26_GM002817	DEG10620254	58.803	284	117	0	2	285	3	286	2.96e-119	343	Amino sugar and nucleotide sugar metabolism	0
YPG26_GM002724	DEG10620255	45.819	299	155	6	1	297	10	303	9.24e-84	254	Porphyrin metabolism	0
YPG26_GM000116	DEG10470400	44.135	503	257	8	14	507	5	492	1.11e-129	387	Alanine, aspartate and glutamate metabolism	0
YPG26_GM000988	DEG10010072	39.744	390	221	5	16	404	7	383	2.78e-87	270	D-Amino acid metabolism	0
YPG26_GM001729	DEG10400361	58.706	402	161	2	3	399	6	407	2.74e-171	490	Riboflavin metabolism	0
YPG26_GM001597	DEG10470335	58.734	395	158	1	1	395	1	390	1.25e-158	452	Glycolysis / Gluconeogenesis	0
YPG26_GM001759	DEG10010163	51.643	213	102	1	11	222	4	216	3.97e-71	216	Pyrimidine metabolism	0
YPG26_GM003366	DEG10510227	58.75	240	89	3	4	241	5	236	1.16e-97	290	Arginine and proline metabolism	0
YPG26_GM002483	DEG10010139	64.97	334	116	1	6	338	5	338	8.63e-165	462	Propanoate metabolism	0
YPG26_GM000742	DEG10580012	69.535	430	131	0	1	430	1	430	0	636	Glycerophospholipid metabolism	0
YPG26_GM003448	DEG10010253	71.325	415	119	0	4	418	1	415	0	628	Glycine, serine and threonine metabolism	0
YPG26_GM001921	DEG10470380	61.708	1136	421	8	1	1134	8	1131	0	1425	Cysteine and methionine metabolism	0
YPG26_GM001504	DEG10610270	46.983	232	116	3	11	242	6	230	6.09e-68	208	Pyrimidine metabolism	0
YPG26_GM001793	DEG10410525	32.979	282	186	3	21	300	6	286	1.38e-44	155	Pyrimidine metabolism	0
YPG26_GM001085	DEG10510194	59.104	357	144	2	5	359	3	359	6.17e-147	419	Valine, leucine and isoleucine biosynthesis	0
YPG26_GM000250	DEG10510464	30.27	370	223	10	10	363	10	360	1.08e-35	134	Histidine metabolism	0
YPG26_GM002628	DEG10050505	59.348	460	185	2	1	458	1	460	0	562	Citrate cycle	0
YPG26_GM003365	DEG10130043	54.048	457	209	1	1	456	16	472	0	519	Arginine and proline metabolism	0
YPG26_GM002438	DEG10640235	59.497	358	143	2	3	359	1	357	2.61e-153	435	Valine, leucine and isoleucine degradation	0
YPG26_GM000750	DEG10130291	54.943	526	224	5	1	515	1	524	0	569	Histidine metabolism	0
YPG26_GM000137	DEG10470004	73.101	487	129	1	1	485	1	487	0	759	Purine metabolism	0
YPG26_GM003835	DEG10580263	67.681	427	138	0	3	429	1	427	0	624	Purine metabolism	0
YPG26_GM000712	DEG10010069	56.897	348	147	2	11	355	1	348	1.26e-140	402	D-Amino acid metabolism	0
YPG26_GM000252	DEG10400390	51	400	194	1	25	424	33	430	1.3e-141	411	Biosynthesis of amino acids	0
YPG26_GM001270	DEG10400165	48.586	601	250	10	5	549	12	609	0	531	Valine, leucine and isoleucine biosynthesis	0
YPG26_GM001592	DEG10470381	46.85	619	310	7	5	622	4	604	0	566	One carbon pool by folate	0
YPG26_GM002993	DEG10150297	35.2	250	140	4	25	252	35	284	3.21e-44	150	Glycerolipid metabolism	0
YPG26_GM000710	DEG10630229	62.592	409	150	2	1	408	1	407	0	535	Citrate cycle (TCA cycle)	0
YPG26_GM003367	DEG10130195	53.135	303	135	1	15	317	4	299	2e-116	337	Arginine biosynthesis	0
YPG26_GM000966	DEG10450072	40.86	465	267	3	1	464	59	516	1.37e-127	379	Glycine, serine and threonine metabolism	0
YPG26_GM001037	DEG10400365	38.17	317	166	6	6	303	11	316	5.77e-56	184	porphyrin metabolism	0
YPG26_GM000216	DEG10540037	31.183	93	56	3	110	198	651	739	0.2	32.7	Arginine and proline metabolism	0
YPG26_GM001501	DEG10470336	57.477	428	177	1	1	428	1	423	5.24e-179	505	Pyrimidine metabolism	0
YPG26_GM000073	DEG10010008	59.223	206	84	0	6	211	3	208	6.23e-82	242	Pyrimidine metabolism	0
YPG26_GM000258	DEG10400500	44.595	222	106	4	5	225	4	209	1.28e-59	186	others	0
YPG26_GM001727	DEG10190049	42.276	369	193	7	8	363	1	362	3.38e-90	275	D-Amino acid metabolism	0
YPG26_GM001816	DEG10400289	46.207	290	145	4	10	296	1	282	1.77e-80	252	beta-Alanine metabolism	0
YPG26_GM001704	DEG10020163	44.902	461	206	4	1	454	5	424	4.77e-137	400	Valine, leucine and isoleucine degradation	0
YPG26_GM001474	DEG10470340	46.467	467	226	5	9	475	7	449	7.9e-134	393	D-Glutamine and D-glutamate metabolism	0
YPG26_GM001177	DEG10560039	58.726	424	173	2	12	433	3	426	0	521	porphyrin metabolism	0
YPG26_GM002591	DEG10650230	50.968	155	76	0	10	164	5	159	2.17e-58	179	Pantothenate and CoA biosynthesis	0
YPG26_GM001477	DEG10010106	49.333	300	151	1	1	299	1	300	2.45e-107	313	Amino sugar and nucleotide sugar metabolism	0
YPG26_GM002725	DEG10630233	47.941	340	173	4	4	341	6	343	1.96e-112	330	Porphyrin metabolism	0
YPG26_GM003322	DEG10010020	75.159	157	39	0	1	157	1	157	5.18e-84	243	Terpenoid backbone biosynthesis	0
YPG26_GM001836	DEG10580349	49.63	405	200	3	10	414	12	412	2e-136	396	Arginine and proline metabolism	0
YPG26_GM002506	DEG10420289	40.909	264	146	4	1	259	1	259	1.39e-54	176	Lipopolysaccharide biosynthesis	0
YPG26_GM003323	DEG10010019	48.018	227	115	3	12	236	5	230	4.19e-65	201	Terpenoid backbone biosynthesis	0
YPG26_GM003371	DEG10400362	46.491	342	182	1	10	350	11	352	5.21e-105	311	Arginine and proline metabolism	0
YPG26_GM000253	DEG10510504	52.577	194	91	1	13	205	4	197	5.1e-70	211	Histidine metabolism	0
YPG26_GM001423	DEG10380058	46.903	113	57	2	3	113	14	125	1.09e-26	95.9	Glycerolipid metabolism	0
YPG26_GM001043	DEG10520394	22.609	115	63	3	195	285	115	227	0.28	32	Porphyrin metabolism	0
YPG26_GM000115	DEG10280515	42.105	304	169	2	10	306	31	334	7.03e-85	258	Nicotinate and nicotinamide metabolism	0
YPG26_GM001730	DEG10400578	54.14	157	66	3	4	155	3	158	1.4e-60	184	Riboflavin metabolism	0
YPG26_GM000257	DEG10510502	58.661	254	102	1	2	252	3	256	8.82e-103	298	Histidine metabolism	0
YPG26_GM001038	DEG10400129	31.538	130	82	3	5	129	229	356	1.61e-10	58.9	Porphyrin metabolism	0
YPG26_GM000256	DEG10400454	52.301	239	114	0	6	244	3	241	5.62e-75	227	Folate biosynthesis	0
YPG26_GM001777	DEG10290322	44.828	203	104	1	15	209	6	208	6.05e-53	169	Ubiquinone and other terpenoid-quinone biosynthesis	0
YPG26_GM001476	DEG10010105	50.137	365	178	3	1	365	1	361	1.65e-124	362	Peptidoglycan biosynthesis	0
YPG26_GM001044	DEG10400257	34.239	184	104	5	1	182	1	169	1.61e-25	96.7	Porphyrin metabolism	0
YPG26_GM001045	DEG10400122	32.946	258	150	9	10	264	11	248	2.19e-16	75.9	Porphyrin metabolism	0
YPG26_GM002507	DEG10210195	55.2	250	104	2	9	254	4	249	2.79e-96	281	Terpenoid backbone biosynthesis	0
YPG26_GM003420	DEG10010250	36.515	241	148	3	9	247	3	240	1.09e-52	171	Teichoic acid biosynthesis	0
YPG26_GM001776	DEG10080272	36.918	279	168	5	10	284	14	288	5.17e-53	174	Ubiquinone and other terpenoid-quinone biosynthesis	0
YPG26_GM001473	DEG10010103	56.426	319	134	2	12	326	4	321	8.74e-122	352	Peptidoglycan biosynthesis	0
YPG26_GM000090	DEG10010011	68.198	283	89	1	4	286	1	282	9.62e-139	392	Terpenoid backbone biosynthesis	0
YPG26_GM001687	DEG10010170	60.806	620	241	2	3	620	3	622	0	771	Terpenoid backbone biosynthesis	0
YPG26_GM002505	DEG10470279	54.354	379	173	0	1	379	2	380	1.04e-156	445	Terpenoid backbone biosynthesis	0
YPG26_GM001171	DEG10610077	46.083	434	232	1	1	432	1	434	5.44e-132	388	Phenylpropanoid biosynthesis	0
YPG26_GM002922	DEG10010177	67.568	296	96	0	1	296	19	314	4.81e-151	425	Zeatin biosynthesis	0
YPG26_GM001920	DEG10400115	32.075	53	33	2	87	138	257	307	2.7	28.1	Cysteine and methionine metabolism	0
YPG26_GM001838	DEG10470142	30.748	361	238	7	23	375	29	385	2.57e-48	167	Alanine, aspartate and glutamate metabolism	0
YPG26_GM003853	DEG10470511	40.458	262	156	0	19	280	7	268	7.57e-69	214	Transport, extracellular	0
YPG26_GM003262	DEG10270433	41.597	238	123	1	8	229	15	252	2.86e-63	197	others	0
YPG26_GM001164	DEG10010176	78.187	353	77	0	5	357	9	361	0	553	Terpenoid backbone biosynthesis	0
YPG26_GM000715	DEG10650041	54.762	252	112	1	5	254	4	255	9.42e-92	270	Fatty acid	0
YPG26_GM003704	DEG10570458	53.077	260	122	0	2	261	6	265	2.32e-92	274	Fatty acid	0
YPG26_GM003261	DEG10580195	23.404	94	60	4	145	230	51	140	0.4	31.6	Sulfur metabolism	0
YPG26_GM001064	DEG10450246	34.52	281	179	4	31	308	33	311	9.39e-54	177	Glycerophospholipid metabolism	0
YPG26_GM003321	DEG10010021	68.542	480	151	0	2	481	3	482	0	691	others	0
YPG26_GM003321	DEG10200022	28.571	49	35	0	206	254	275	323	8.2	28.5	Glycerophospholipid metabolism	0
YPG26_GM002467	DEG10010141	54.124	194	85	2	2	195	3	192	6.97e-63	192	Glycerophospholipid metabolism	0
YPG26_GM003637	DEG10470058	25.193	389	219	13	117	497	147	471	3.53e-16	80.5	Pantothenate and CoA biosynthesis	0
YPG26_GM000118	DEG10460237	40	255	152	1	1	255	2	255	6.86e-69	212	porphyrin metabolism	0
YPG26_GM001110	DEG10140265	33.898	59	30	2	10	66	1111	1162	3.1	28.1	Riboflavin metabolism	0
YPG26_GM000579	DEG10130470	32.716	162	100	4	10	168	22	177	5.76e-13	64.7	Aminosugar metabolism	0
YPG26_GM003243	DEG10590045	46.815	628	312	9	1	610	1	624	0	553	arginine biosynthesis	0
YPG26_GM002069	DEG10270213	25.14	358	223	12	273	602	9	349	3.78e-15	76.6	arginine biosynthesis	0
YPG26_GM003368	DEG10450040	44.724	398	211	4	25	416	3	397	9.06e-109	325	alanine,aspartate and glutamate metabolism	0
YPG26_GM001140	DEG10470103	55.375	614	274	0	1	614	1	614	0	721	Lysine biosynthesis	0
YPG26_GM002365	DEG10200132	23.308	266	179	8	14	278	29	270	2.29e-07	51.2	Lysine biosynthesis	0
YPG26_GM001809	DEG10070080	51.145	262	119	3	7	268	3	255	6.13e-89	264	Valine, leucine, and isoleucine metabolism	0
YPG26_GM001084	DEG10400396	69.419	327	99	1	5	330	1	327	4.01e-169	472	Fatty acid synthesis	0
YPG26_GM003424	DEG10640204	59.574	141	57	0	1	141	4	144	1.04e-59	181	Sulfur metabolism	0
YPG26_GM002176	DEG10400005	41.812	574	310	7	7	561	1	569	1.25e-154	456	Sulfur metabolism	0
YPG26_GM002177	DEG10470268	30.293	614	377	23	40	612	459	1062	1.38e-63	226	Phenylalanine, tyrosine and tryptophan biosynthesis	0
YPG26_GM000123	DEG10130295	56.186	194	80	1	1	189	1	194	3.29e-84	246	Phenylalanine, tyrosine and tryptophan biosynthesis	0
YPG26_GM001786	DEG10400262	44.802	529	253	12	1	502	1	517	4.35e-140	413	Cysteine and methionine metabolism	0
YPG26_GM001200	DEG10510261	42.043	421	235	3	3	416	1	419	1.35e-113	339	Terpenoid backbone biosynthesis	0
YPG26_GM001774	DEG10010159	34.483	116	72	3	2	116	24	136	1.91e-14	70.1	Terpenoid backbone biosynthesis	0
YPG26_GM001779	DEG10010157	47.84	324	165	1	1	324	29	348	6.71e-110	323	Pantothenate and CoA biosynthesis	0
YPG26_GM001457	DEG10340545	24.138	319	204	10	5	310	11	304	0.00014	42.4	Ubiquinone and other terpenoid-quinone biosynthesis	0
YPG26_GM001832	DEG10280114	28	50	31	1	1	50	105	149	5.5	27.3	Cysteine and methionine metabolism	0
YPG26_GM001834	DEG10400358	25.735	408	260	11	29	400	59	459	1.2e-23	101	Cysteine and methionine metabolism	0
YPG26_GM001833	DEG10280096	29.412	102	69	2	8	107	79	179	0.01	35.8	Cysteine and methionine metabolism	0
YPG26_GM001654	DEG10580026	36.946	203	125	2	17	218	4	204	3.78e-42	143	Transport, extracellular	0
YPG26_GM001702	DEG10470368	67.378	328	106	1	10	336	6	333	1.21e-155	439	Valine, leucine and isoleucine degradation	0
YPG26_GM001703	DEG10640243	58.537	328	135	1	1	328	1	327	6.04e-143	406	Valine, leucine and isoleucine degradation	0
YPG26_GM003326	DEG10500084	44.199	181	93	4	6	179	11	190	1.04e-42	144	Glycerophospholipid metabolism	0
YPG26_GM000059	DEG10010002	51.852	378	181	1	1	378	1	377	1.03e-130	379	others	0
YPG26_GM000063	DEG10010003	70.219	638	188	1	1	636	1	638	0	933	others	0
YPG26_GM000076	DEG10010009	33.436	326	215	2	1	324	3	328	8.34e-57	186	others	0
YPG26_GM000234	DEG10010007	39.685	572	313	6	1	566	18	563	4.43e-146	432	others	0
YPG26_GM001384	DEG10010185	39.185	319	194	0	8	326	7	325	1.2e-80	248	others	0
YPG26_GM001598	DEG10010112	49.297	854	379	10	3	852	2	805	0	815	others	0
YPG26_GM001731	DEG10010168	48.81	252	119	6	6	255	7	250	2.54e-59	188	others	0
YPG26_GM001732	DEG10010167	46	200	103	2	1	200	3	197	8.48e-54	169	others	0
YPG26_GM002552	DEG10010128	66.57	688	229	1	1	688	1	687	0	957	others	0
YPG26_GM002578	DEG10010121	45.946	1184	635	4	1	1183	1	1180	0	997	others	0
YPG26_GM003020	DEG10010208	33.438	317	200	8	9	322	1	309	4.59e-54	178	others	0
YPG26_GM003849	DEG10010268	54.651	172	61	2	1	156	2	172	6.31e-59	180	others	0
YPG26_GM002500	DEG10010136	71.637	342	97	0	2	343	4	345	1.24e-171	482	others	0
YPG26_GM002579	DEG10010120	60.714	224	88	0	5	228	20	243	8.58e-94	274	others	0
YPG26_GM003271	DEG10010062	78.025	314	69	0	22	335	1	314	0	504	others	0
YPG26_GM003304	DEG10470012	76.218	1190	282	1	1	1190	10	1198	0	1889	others	0
YPG26_GM003305	DEG10010028	78.873	1136	233	4	1	1133	41	1172	0	1867	others	0
YPG26_GM003831	DEG10010262	44.908	599	322	7	11	605	5	599	2.31e-159	469	others	0
YPG26_GM003832	DEG10650195	65.532	235	79	1	1	235	1	233	7.03e-113	322	others	0
YPG26_GM003867	DEG10020301	46.296	108	57	1	1	108	1	107	3.08e-26	94	others	0
Carbohydrate metabolism	8
Energy metabolism	3
Lipid metabolism	10
Nucleotide metabolism	9
Amino acid metabolism	44
Biosynthesis of other secondary metabolites	1
others	25
Glycan biosynthesis and metabolism	4
Glutathione metabolism	30
Metabolism of terpenoids and polyketides	10
Xenobiotics biodegradation and metabolism	0
Membrane transport	2
	146
